# Supplementary material
Source: PubMed Central journal article supplement (PMC7594396)

**Supplemental Table 1.** ICD-9 codes of the outcomes (cardiovascular diseases)

| <b>Cardiovascular diseases</b>   | <b>ICD-9 codes</b>                                                                      |
|----------------------------------|-----------------------------------------------------------------------------------------|
| Ischemic heart disease           | 410-413, 414.0, 414.8, 414.9, 429.7, V45.81, V45.82                                     |
| Cardiomyopathy and heart failure | 425, 402.01, 402.11, 402.91, 404.01, 404.03, 404.11, 404.13, 404.91, 404.93, 428, V42.1 |

**Abbreviation:** ICD-9, The International Classification of Diseases Ninth Revision

**Supplemental Table 2.** Characteristics of the excluded patients who did not receive chemotherapy (n = 1,138), Hong Kong, 2000–2018.

| <b>Characteristics</b>                                        | <b>Excluded patients who did not receive chemotherapy (n = 1,138)</b> |
|---------------------------------------------------------------|-----------------------------------------------------------------------|
| <b>Patient's factors</b>                                      |                                                                       |
| <b>Age at lymphoma diagnosis, y</b>                           |                                                                       |
| Median (interquartile range)                                  | 69 (55 to 79)                                                         |
| <b>Sex, n (%)</b>                                             |                                                                       |
| Male                                                          | 621 (54.6)                                                            |
| Female                                                        | 517 (45.4)                                                            |
| <b>Race, n (%)</b>                                            |                                                                       |
| Chinese                                                       | 1088 (95.6)                                                           |
| Non-Chinese                                                   | 50 (4.4)                                                              |
| <b>RCS Co-morbidity Scores, n (%)</b>                         |                                                                       |
| 0                                                             | 729 (64.1)                                                            |
| 1                                                             | 276 (24.2)                                                            |
| ≥2                                                            | 133 (11.7)                                                            |
| <b>Follow-up time for alive patients, y</b>                   |                                                                       |
| Median (interquartile range)                                  | 1.5 (0.1 to 6.2)                                                      |
| <b>Year of diagnosis, n (%)</b>                               |                                                                       |
| 2000–2004                                                     | 356 (31.3)                                                            |
| 2005–2009                                                     | 233 (20.5)                                                            |
| 2010–2014                                                     | 267 (23.4)                                                            |
| 2015–2018                                                     | 282 (24.8)                                                            |
| <b>Fee waiver recipients (surrogate for lower SES), n (%)</b> | 151 (13.3)                                                            |
| <b>COPD or smoker, n (%)</b>                                  | 252 (22.1)                                                            |
| <b>Alcohol-related diseases, n (%)</b>                        | 10 (0.9)                                                              |
| <b>Diabetes mellitus, n (%)</b>                               | 258 (22.7)                                                            |
| <b>Hypertension, n (%)</b>                                    | 750 (65.9)                                                            |
| <b>Dyslipidemia/hyperlipidemia, n (%)</b>                     | 192 (16.9)                                                            |
| <b>Anxiety or depressive disorders, n (%)</b>                 | 142 (12.5)                                                            |
| <b>Atrial fibrillation, n (%)</b>                             | 64 (5.6)                                                              |
| <b>ACE inhibitor use, n (%)</b>                               | 250 (22.0)                                                            |
| <b>Beta-blocker use, n (%)</b>                                | 316 (27.8)                                                            |
| <b>Aspirin use, n (%)</b>                                     | 257 (22.6)                                                            |
| <b>Treatment factors</b>                                      |                                                                       |
| <b>Received radiation, n (%)</b>                              | 78 (6.9)                                                              |

**Rituximab, n (%)**

293 (25.8)

---

**Abbreviation:** ACE, angiotensin-converting enzyme; RCS, Royal College of Surgeons; COPD, chronic obstructive pulmonary disease; SES, socioeconomic status.

**Supplemental Table 3.** ICD-9 codes and the associated medications of the medical conditions.

| <b>Medical conditions</b>                | <b>ICD-9 codes</b>                                | <b>Medications</b>                                                                                                                                                                                                                                                                                                                                                                                                |
|------------------------------------------|---------------------------------------------------|-------------------------------------------------------------------------------------------------------------------------------------------------------------------------------------------------------------------------------------------------------------------------------------------------------------------------------------------------------------------------------------------------------------------|
| Hypertension                             | 401.X, 402.X,<br>403.X, 404.X,<br>405.X           | Amlodipine, Diltiazem, Felodipine, Nifedipine, Verapamil, Atenolol, Bisoprolol<br>Carvedilol, Labetalol, Metoprolol, Propranolol, Clonidine, Hydralazine, Losartan, Telmisartan,<br>Valsartan, Bumetanide, Frusemide, Amiloride, Eplerenone, Spironolactone, Hydrochlorothiazide,<br>Indapamide, Moduretic, Dyazide, Methyldopa, Doxazosin, Prazosin, Terazosin, Captopril,<br>Enalapril, Lisinopril, Perindopril |
| Dyslipidemia                             | 272.0, 272.1,<br>272.2, 272.3,<br>272.4           | Atorvastatin, Rosuvastatin, Simvastatin, Fenofibrate, Gemfibrozil, Ezetimibe                                                                                                                                                                                                                                                                                                                                      |
| Diabetes                                 | 249, 250.xx,<br>357.2, 362.0,<br>366.41, or 648.0 | Insulin Neutral, Insulin Lispro, Insulin Aspart, Insulin Human, Insulin Lispro Human, Insulin<br>Aspart Human Analog, Insulin Detemir, Insulin Isophane Human, Insulin Degludec, Insulin<br>Glargine, Gliclazide, Glimepiride, Glipizide, Metformin, Alogliptin, Linagliptin, Sitagliptin,<br>Dulaglutide, Exenatide, Liraglutide, Lixisenatide, Pioglitazone, Dapagliflozin, Empagliflozin,<br>Acarbose          |
| Atrial fibrillation                      | 427.31                                            | -                                                                                                                                                                                                                                                                                                                                                                                                                 |
| Depression                               | 296.2, 296.3,<br>300.4, 311                       | Citalopram, Escitalopram, Fluoxetine, Fluvoxamine, Paroxetine, Sertraline, Venlafaxine,<br>Desvenlafaxine, Duloxetine, Amitriptyline, Doxepin, Imipramine, Vortioxetine, Milnacipran,<br>Mirtazapine, Mianserin, Trazodone                                                                                                                                                                                        |
| Chronic obstructive<br>pulmonary disease | 491, 492, 496                                     | Beclomethasone, Budesonide +/- Formoterol, Fluticasone, Flutiform or equivalent, Relvar or<br>equivalent, Seretide or equivalent, Trelegy or equivalent, Anoro or equivalent, Ultibro or<br>equivalent, Spiolto or equivalent, Combivent or equivalent, Tiotropium, Ipratropium,<br>Glycopyrronium, Indacaterol, Salbutamol, Montelukast, Roflumilast, Theophylline, Terbutaline                                  |

|                          |                                                                      |
|--------------------------|----------------------------------------------------------------------|
| Smoking                  | V15.82                                                               |
| Alcohol-related diseases | 291, 303, 305.0, -<br>571.0, 571.1,<br>571.2, 571.3,<br>980.8, 980.9 |
| Autoimmune diseases      | 340, 714, 135,<br>710, 710.1                                         |

---

**Abbreviation:** ICD-9, The International Classification of Diseases Ninth Revision

**Supplemental Table 4.** Characteristics of diffuse large B-cell lymphoma survivors who received different doses of doxorubicin (N = 2,600), Hong Kong, 2000–2018.

| Characteristics                                               | No<br>doxorubicin<br>(N = 1,735) | ≤500 mg<br>doxorubicin<br>(N = 699) | >500 mg<br>doxorubicin<br>(N = 166) |
|---------------------------------------------------------------|----------------------------------|-------------------------------------|-------------------------------------|
| <b>Patient's factors</b>                                      |                                  |                                     |                                     |
| <b>Age at lymphoma diagnosis, y</b>                           |                                  |                                     |                                     |
| Median (interquartile range)                                  | 66 (56 to 75)                    | 58 (46 to 68)                       | 54 (46 to 62)                       |
| <b>Sex, n (%)</b>                                             |                                  |                                     |                                     |
| Male                                                          | 964 (55.6)                       | 375 (53.6)                          | 117 (70.5)                          |
| Female                                                        | 771 (44.4)                       | 324 (46.4)                          | 49 (29.5)                           |
| <b>Race, n (%)</b>                                            |                                  |                                     |                                     |
| Chinese                                                       | 1,660 (95.7)                     | 668 (95.6)                          | 156 (94.0)                          |
| Non-Chinese                                                   | 75 (4.3)                         | 31 (4.4)                            | 10 (6.0)                            |
| <b>RCS Co-morbidity Scores, n (%)</b>                         |                                  |                                     |                                     |
| 0                                                             | 1143 (65.9)                      | 460 (65.8)                          | 107 (64.5)                          |
| 1                                                             | 428 (24.7)                       | 189 (27.0)                          | 47 (28.3)                           |
| ≥2                                                            | 164 (9.4)                        | 50 (7.2)                            | 12 (7.2)                            |
| <b>Follow-up time for alive patients, y</b>                   |                                  |                                     |                                     |
| Median (interquartile range)                                  | 6.4 (3.4 to 9.8)                 | 8.0 (3.6 to 13.0)                   | 6.6 (3.9 to 9.6)                    |
| <b>Year of diagnosis, n (%)</b>                               |                                  |                                     |                                     |
| 2000–2004                                                     | 266 (15.3)                       | 119 (17.0)                          | 13 (7.8)                            |
| 2005–2009                                                     | 417 (24.0)                       | 231 (33.0)                          | 49 (29.5)                           |
| 2010–2014                                                     | 614 (35.4)                       | 194 (27.8)                          | 62 (37.4)                           |
| 2015–2018                                                     | 438 (25.2)                       | 155 (22.2)                          | 42 (25.3)                           |
| <b>Fee waiver recipients (surrogate for lower SES), n (%)</b> | 152 (8.8)                        | 40 (5.7)                            | 8 (4.8)                             |
| <b>COPD or smoker, n (%)</b>                                  | 439 (25.3)                       | 170 (24.3)                          | 36 (21.7)                           |
| <b>Alcoholic liver disease, n (%)</b>                         | 12 (0.7)                         | 4 (0.6)                             | 2 (1.2)                             |
| <b>Diabetes mellitus, n (%)</b>                               | 434 (25.0)                       | 137 (19.6)                          | 27 (16.3)                           |
| <b>Hypertension, n (%)</b>                                    | 1,238 (71.4)                     | 464 (66.4)                          | 95 (57.2)                           |
| <b>Dyslipidemia/hyperlipidemia, n (%)</b>                     | 427 (24.6)                       | 133 (19.0)                          | 26 (15.7)                           |
| <b>Anxiety or depressive disorders, n (%)</b>                 | 294 (17.0)                       | 122 (17.4)                          | 20 (12.0)                           |

|                                   |              |            |            |
|-----------------------------------|--------------|------------|------------|
| <b>Atrial fibrillation, n (%)</b> | 26 (1.5)     | 5 (0.7)    | 0 (0.0)    |
| <b>ACE inhibitor use, n (%)</b>   | 411 (23.7)   | 127 (18.2) | 36 (21.7)  |
| <b>Beta-blocker use, n (%)</b>    | 549 (31.6)   | 211 (30.2) | 32 (19.3)  |
| <b>Aspirin use, n (%)</b>         | 419 (24.2)   | 154 (22.0) | 29 (17.5)  |
| <hr/>                             |              |            |            |
| <b>Treatment factors</b>          |              |            |            |
| <b>Received radiation, n (%)</b>  | 204 (11.8)   | 84 (12.0)  | 20 (12.0)  |
| <b>Rituximab, n (%)</b>           | 1,337 (77.1) | 509 (72.8) | 134 (80.7) |
| <hr/>                             |              |            |            |

**Abbreviation:** ACE, angiotensin-converting enzyme; RCS, Royal College of Surgeons; COPD, chronic obstructive pulmonary disease; SES, socioeconomic status.

**Supplemental Figure 1.** Cause-specific cumulative incidence of cardiovascular diseases in DLBCL survivors who had received >500 mg of doxorubicin, pre-existing hypertension, and with aspirin use (surrogate for pre-existing cardiovascular risk factors) versus those who received, ≤500 mg of doxorubicin, with no pre-existing hypertension and aspirin use, Hong Kong, 2000–2018.

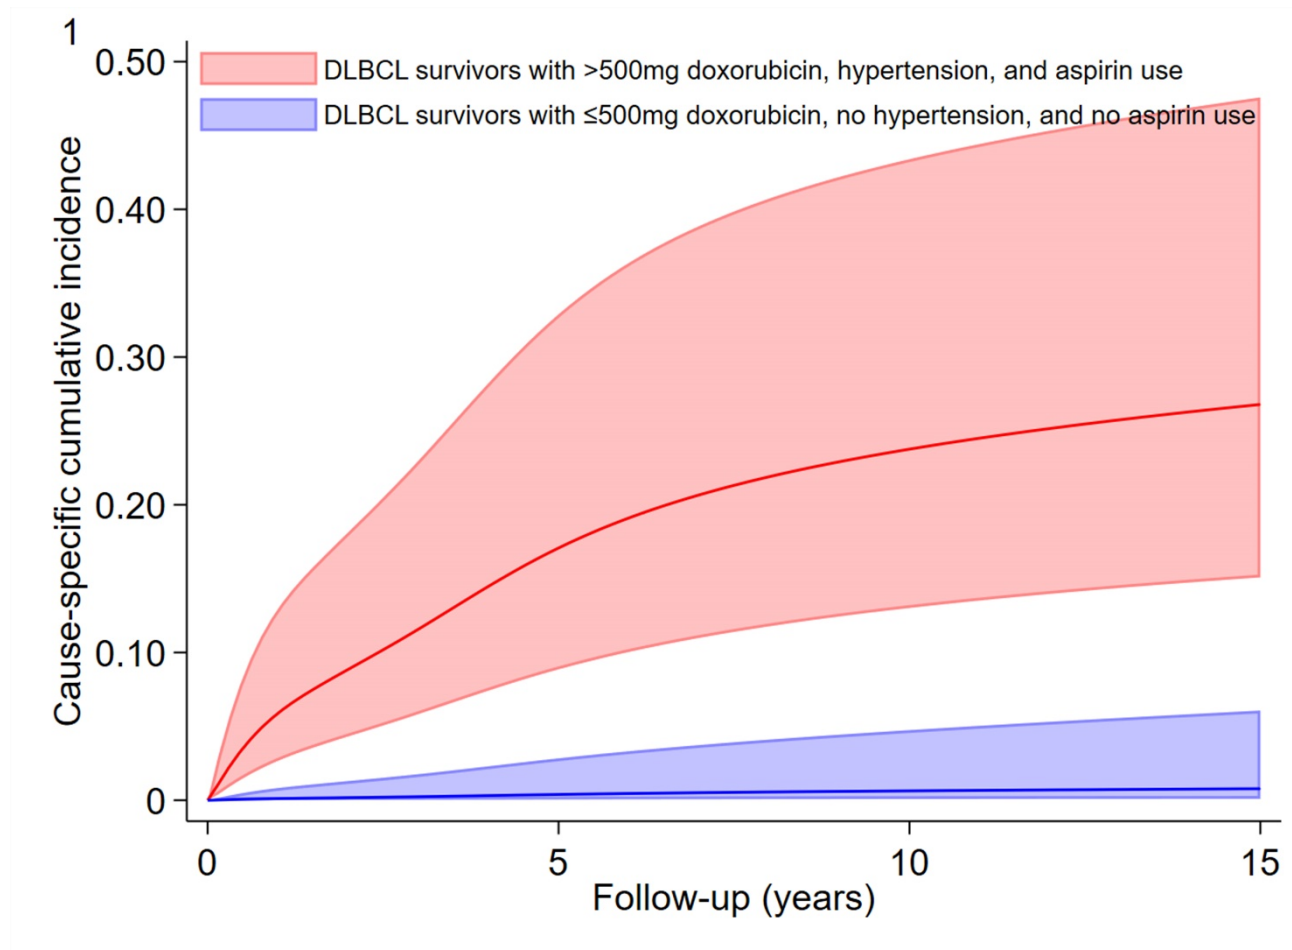



**Supplemental Figure 2.** Cause-specific cumulative incidence of cardiovascular diseases in DLBCL survivors by levels of exposure to doxorubicin (n = 2,600) and in normal comparison group (n = 13,000) with non-cardiac death as competing risk, using no landmark period for left truncation, Hong Kong, 2000–2018.

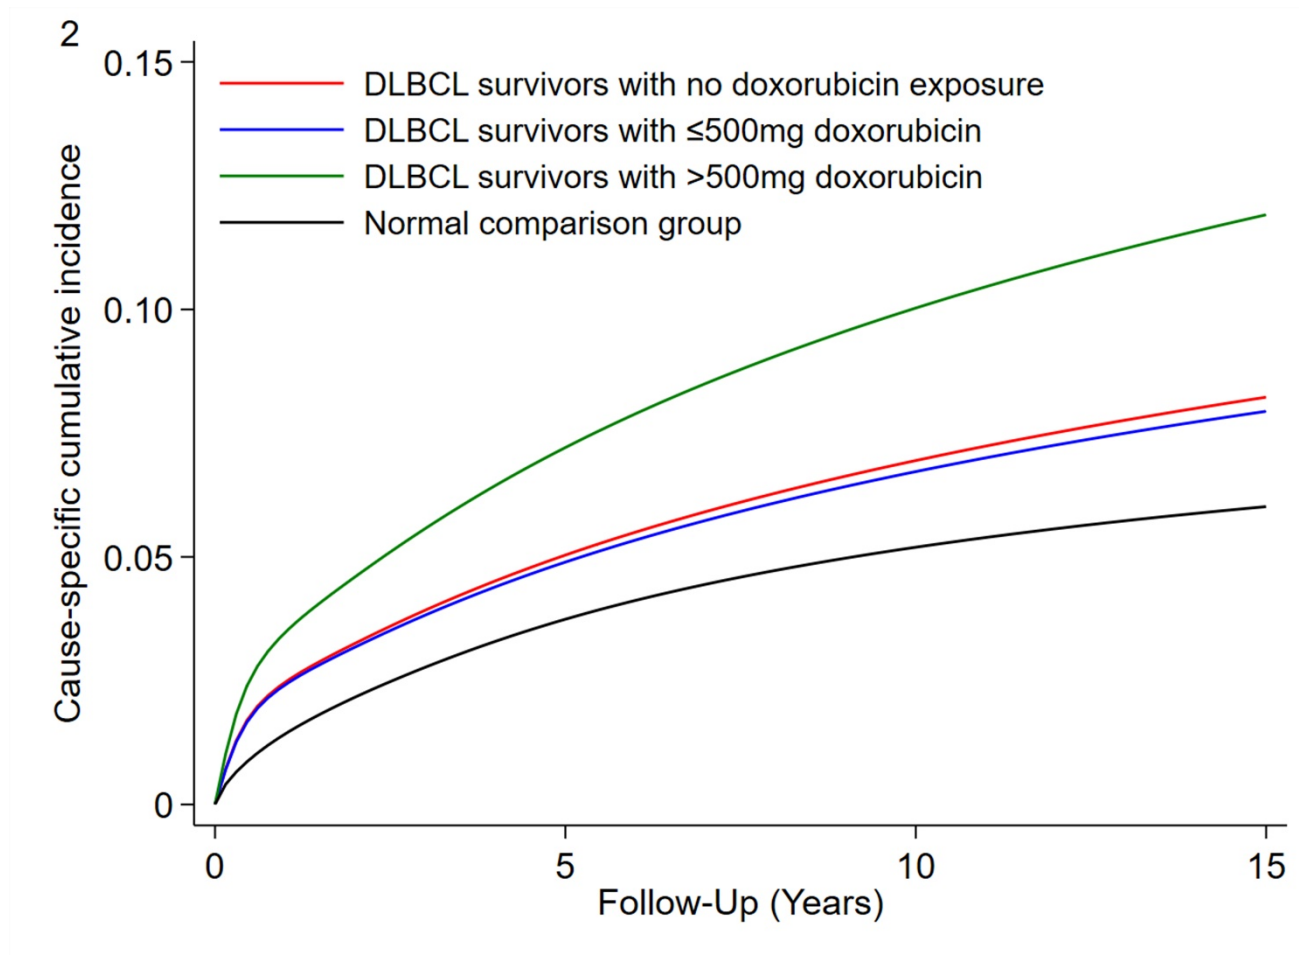

Supplement: advancesADV2020002737-suppl1.pdf [file advancesADV2020002737-suppl1.pdf]
